# Supplementary material for: Identification of Early Warning Signals at the Critical Transition Point of Colorectal Cancer Based on Dynamic Network Analysis
Source: Front Bioeng Biotechnol. 2020 May 29;8:530. doi: 10.3389/fbioe.2020.00530 (PMC7272579; doi:10.3389/fbioe.2020.00530)
Supplement: TABLE S2 — The patient’s driver mutation sequence. [file Table_2.XLSX]

## Sheet: Sheet1
The patient's driver mutation sequence
CMS1	TCGA-A6-5665	JPH3	EVC2	CAD	TTPAL	CDH8	AXIN2	FAT4	IFT80	CELSR1	LMO7	TAF1L	TRPS1	HECW1	DYNC1H1/TAOK2	MAP1S	NRXN3	PTPRT	GIGYF2	ARID1A	CROCC	NFATC1	CSDE1/POLG	PI4KB	KCND2	SYNE1	MUC16	SETD2	TUBGCP3	MUC2	DDR2	CACNA1E	SRCAP	RBP1	ACACB	DNAJC6	CADM1	NEB	KRT2	PKD2	PAPPA	RASSF2	HLA-A	BRF1	THBS2	CARD11	PTPRZ1	DGKD	ZNF598
CMS1	TCGA-AA-3713	SLIT1	CACNA1E	CELSR1/DLGAP2	TAOK2	BCL9	CDH10/GRIK3	TRPS1	PTCH1	PTPRT	FLT4	PCLO	GUCY2D	SOX9	CD40LG	PKD2L1	CLSTN3	MYH13	EP400	RANBP2	CDH4	SPEN	MUC16	BRAF	GRIK2/TRPC4	NEB	ANK3	SAP130	ADCY1	BRF1	MYO18B	MUC2	LRP1B	F2RL3	MN1	NLRP1	RYR2	FAT4	FGFR2	EPHB1	RELN	NUMBL	ITGAD	SNX1	COL1A2	CACNA1B	KCNA5	APOB	ZFPM1
CMS1	TCGA-AZ-6598	JPH3	MYO3A	LMO7	FAT4	MN1	SAP130	SEC16A	NUMBL	ADCY8	CLSTN3	IDH1	IFT80	IL1RAPL1	PI4KB	ADCY1/SCN8A	ITPKB	HECW1	PTPRT	NRXN3	NBAS	PKHD1	GIGYF2/SYNE1	LRP4	ACACB	DYNC1H1	RAI1	CACNA1H	SETD2	PKD2L1	DMBT1	PCLO	CACNA1E	CELSR1	FIZ1	ARID1A	POLG	LAMA5	PCNT	THBS2	GOLGA3	MYH13	SRCAP	COL18A1	DGKD	SLIT2	MUC16	RYR2	FBN1
CMS1	TCGA-AZ-6601	SCN8A	FAT4	SI	ARHGAP21	ADAM22	LMO7	MYO3A	ZNF521	MN1	CUBN	RYR2	JPH3	EVC2	CPXM2	CDC42EP1	LATS2	CROCC	HECW1	USH2A	SOX9/TRPS1	MCM3AP	GUCY2D	HTT	APC/CDH4	NES	CACNA1E	MEFV	GIGYF2	PTPRT	MUC4	BRF1	MAP1S	GAB3	SYNE1	MUC2	INSRR	NFATC1	DYNC1H1	BCL9	CDH18	ANKRD11	TCF7L2	PCLO	LRP4	ADCY1	GRIA2	MSH6	SEC16A
CMS2	TCGA-A6-2680	SOX9	LRP1B	RYR1	GUCY1A2	FAT4	KRAS/ZNF804A/CDH18
CMS2	TCGA-A6-5659	PCDH17/PDGFRA/TTN	CDH10	ADCY8	APC	ZNF219	RYR1	COL6A3
CMS2	TCGA-A6-5667	GRM7	TP53	EPHA3	CALCR	NCOR2	APC	MAP1B	LRP2	COL6A3	COL4A1
CMS2	TCGA-AA-3660	PIK3CA	ATP5B	CSDE1	PAPPA/PIK3CG	TP53	CACNA1E	CACNA1H	KRAS	TTN	DMD	FAT4/ANK2/RAC1
CMS2	TCGA-AA-3662	TP53	CACNA1E/TCF7L2	NFATC1	GRIK4	APC	VCAN	TNR	COL6A3/FLNC	AR
CMS2	TCGA-AA-3697	SYNE1	FAT4	APC	MYO18B	TUBGCP3	MAP1B/NFASC
CMS2	TCGA-AA-3712	CDH4	APC	MUC16/PIK3CA	KIDINS220	GLI3	GUCY1A2	TP53	ANK2	COL4A1/OBSCN	PCSK9	KIT	SCN3A/LPA
CMS2	TCGA-AZ-6603	DSCAM	TP53	GRIN3A	DLGAP2	APC	RALY	KRT1	CUBN	FBN1	COL6A3	TTN
CMS3	TCGA-AA-3655	PTPRT	GLI3	APC/MEFV	APOB/NEB	ANK3/TP53	KRAS/OBSCN/RICTOR/CACNA1S
CMS3	TCGA-AA-3663	JPH3	ARHGAP21	FAT4/LMO7	ATP5B	MYO3A	KIF1A/SI	MUC4	ACACB	CELSR1	GRIK2/NES	CARD10	ADCY1	PTPRT	PCDH17	ZNF521	ARID1A	AXIN2	PCLO	PKHD1	BCL9	CROCC	USP6	MUC2	MCM3AP	CACNA1H	DYNC1H1	RAI1	TGIF1	DOK7	SYNE1	DOCK2	RCC1	SPHK1	MUC16	TCF7L2	USH2A	KRAS/PIK3CA/CTNNB1/TTN/KCNJ12/OBSCN/RYR2/MTOR/ATM/LRP1B/EGFR/FLNC/SLIT2/UTRN/NLRP1/CLIC6/EP400/SPTB/CUBN/LRP2/NEB/SCN5A/PTEN/PDGFRA/PRKCB/KLF1/HIVEP3/MEF2A/TYRO3/PRR14/SRCAP/CD7/COL5A3/RYR1/POLRMT/HCLS1/IGF2R/ARAP1/TNNT2/NCOR2/DUSP16/DMD/IGSF9/LRP1/SPTBN2/TNC/TNR/EIF2AK1/ZAP70/SMARCA4/RXRG/JAG2/PKD2/HTT/TACC2/MKI67/BRCA2/PRRT2/GRIN2A/NCOR1/RASSF2/KIDINS220/EPHA1/ANK2/ANK3/MAP1B/PTPRZ1/ROBO2/EPHA7…
CMS3	TCGA-AZ-6599	GRIK3	MUC16	SYNE1	LMO7	DNTT	DST	USP6	ADAMTS13/RUNX1T1	TRPC4	HECW1	CRB2	GABRB3	KRAS	TNC	BRCA2	TTN	PRR14	GRP	NEDD4	PCLO/CREBBP
CMS4	TCGA-A6-2671	SYNE1	TTN	GRIK2	GABRB3	APC	SCN3A	DSCAM	CACNA1H
CMS4	TCGA-A6-2675	SYNE1	FAT4	MEFV	TP53	APC	SAAL1	TGFBR2	ACACB
CMS4	TCGA-A6-2682	TCF7L2	SOX9	PCNT	CTNNB1	IPO7	RYR1	CLSTN3	RP1/TP53	APC	TTN	SNX1	SMAD4	PTEN
CMS4	TCGA-A6-2684	TGIF1	TP53	APC	OSMR	CDH4	MED15
CMS4	TCGA-A6-2685	KRAS	TP53	CTNNB1	PCLO
CMS4	TCGA-AA-3489	FBN1	USH2A	APOB	GLI3	GRIK2	GRID2	COL4A1	MUC16	NES	APC	SCN3A/SYNE1/PLG/CASP8
CMS4	TCGA-AZ-6600	FAT4	ZNF804A	PKHD1	MAGI2	RYR2	TAOK2	KRAS	TP53	ROBO2	APC/TTN/FLNC/NEB/SYNE1
CMS4	TCGA-AZ-6605	TAF1L	TRPS1	RUNX1T1	EPHA7	EPHA3	TP53	DOCK2	SPTA1	THBS2	COL18A1	LRP1B	MSH2	PI4KB	DGKD	GRIK2	FLNC	TTN	APC	CDH1	BRCA2	FAT4/OSMR	IFT80
CMS4	TCGA-F4-6704	CARD11	USH2A	DICER1	TTN	DSP	GRIA2	PTEN/NFASC
NOLBL	TCGA-A6-2679	ORAI1	GRM7	USH2A	DMD/MUC16	APC	ERBB4	FAT4/ADCY1/EZH2
NOLBL	TCGA-A6-2686	JPH3	EVC2	BCL9	FAT4	NUMBL	EIF2AK4	AXIN2	POU4F2	KIF1A	ZNF521	MUC4	PCNT	LATS2	PCDH17	CROCC	IFT80	CELSR1	NBAS	PTPRT	FLG	SPHK1	CD40LG	SCN8A	PRICKLE1	ATP5B	TRPS1	CDH18	CDH10	PKHD1	RAI1	PCLO	GRIA2	DYNC1H1	TBX5	SYNE1	TCF7L2	LRP4	PKD2L1	TNKS1BP1	POLG	CUBN	MUC16	EP400	TAOK2	GRIN3A	SRCAP	MYH13	KLF1
NOLBL	TCGA-AA-3496	MLH3	TP53	TAF1L	SYNE1	EPS8L1	SMAD4	NEB	FLG	GRIK4/SCN5A	PCLO	SV2B	ANK2	ITPR1/TTN	TNR
NOLBL	TCGA-AA-3511	PTPRT	ROBO2	MUC16/TCF7L2	APC	TRPC4	HCLS1	HECW1	MYO18B	TP53	KRAS	TTN/USH2A	GRIN2A	TNR
Note:The bold gene is the transition point of the patient. Multiple genes in the same cell are used " / " separated, indicating that these gene mutations are in the same order.
[truncated: 78 more columns]
