# Supplementary material for: Identification of Early Warning Signals at the Critical Transition Point of Colorectal Cancer Based on Dynamic Network Analysis
Source: Front Bioeng Biotechnol. 2020 May 29;8:530. doi: 10.3389/fbioe.2020.00530 (PMC7272579; doi:10.3389/fbioe.2020.00530)
Supplement: TABLE S3 — The driver mutation sequence of patients with the same CMS. [file Table_3.XLSX]

## Sheet: CMS1
The driver mutation sequence of CMS1.
FAT4	227				Note: The number in the second column indicates how many genes are mutated after the first column of the gene mutation.
JPH3	227				The bigger the number, the earlier the mutation. The numbers are the same and the mutation possibilities are the same.
LMO7	222
PTPRT	204
HECW1	202
CACNA1E	195
MYO3A	194
MN1	191
CELSR1	188
TRPS1	187
GIGYF2	186
SCN8A	186
DYNC1H1	178
SYNE1	178
EVC2	174
ACACB	160
ARID1A	160
IFT80	160
TAOK2	160
PCLO	158
ADCY1	157
RYR2	155
CROCC	154
SEC16A	151
MUC16	149
NRXN3	146
CDH4	144
MAP1S	144
MUC2	143
PI4KB	143
THBS2	143
LRP4	142
LRP1B	141
SOX9	140
CUBN	139
GUCY2D	139
USH2A	139
CLSTN3	137
NFATC1	137
BRF1	134
SETD2	130
SI	130
ARHGAP21	129
BCL9	129
SAP130	129
ADAM22	128
LAMA5	127
MEFV	127
POLG	127
ZNF521	125
CPXM2	119
CDC42EP1	118
PKD2L1	118
LATS2	117
NUMBL	116
SRCAP	116
NEB	114
MCM3AP	111
ADCY8	110
MYH13	109
IDH1	108
IL1RAPL1	106
NES	106
DGKD	102
ITPKB	102
MUC4	101
CAD	100
TTPAL	99
CDH8	98
FLT4	98
GAB3	98
NBAS	98
AXIN2	97
PKHD1	97
INSRR	95
APOB	93
BRAF	92
TAF1L	92
APC	91
CDH18	91
RAI1	91
ANKRD11	90
GOLGA3	90
EP400	89
TCF7L2	89
TP53	89
DMBT1	87
RANBP2	87
GRIA2	85
MSH6	84
FIZ1	83
FLNC	83
SPEN	83
FBN1	81
CSDE1	80
MYO18B	80
SLIT1	80
PCNT	79
OBSCN	78
CELSR2	77
DLGAP2	77
FBN2	77
MAGI2	77
GPRIN2	75
CDH10	74
COL18A1	74
FBXW7	74
GRIN3A	74
GRIK3	73
KRAS	73
TUBGCP3	73
BCOR	72
CACNA1H	72
FGFR2	72
SLIT2	72
DDR2	71
OPRD1	71
PTCH1	71
CTNNB1	69
NLRP1	69
RBP1	68
GLI3	67
TTN	67
KCNJ12	66
CACNA1B	65
CADM1	65
CD40LG	65
FYB	65
MTOR	65
CBX4	64
COL4A1	63
HTT	63
KRT2	63
PIK3CG	63
ANK3	62
IGF2R	62
PKD2	62
DICER1	61
PAPPA	61
RASSF2	60
COL1A2	59
DNTT	59
ADAM17	58
SPTB	58
CARD10	57
CARD11	56
DUSP16	56
HLA-A	56
TNC	56
GRIK2	55
PTPRZ1	55
SCN5A	54
TRPC4	54
ZFPM1	54
KIDINS220	53
SPTBN2	53
ZNF598	53
PRR14	52
RYR1	52
TGIF1	52
KCND2	51
SPTA1	51
HNRNPUL1	50
RP1	50
ACVR2A	49
POLRMT	49
CRB2	48
WT1	48
EP300	47
GRM7	47
TEKT4	47
HCLS1	46
F2RL3	45
MCM4	45
DNAJC6	44
MED15	44
RUNX1T1	43
RBMX	42
ATN1	39
DMD	39
EPHB1	39
DPYSL4	38
DSCAM	38
EFEMP1	38
HSPG2	38
TBX5	38
ITGAD	36
ITPR1	36
CREBBP	35
RELN	35
SNX1	35
TSHR	35
IGFALS	34
JAG2	34
MAML2	33
VCAN	33
BRCA2	32
KCNA5	32
PLG	32
ABLIM3	29
CALCR	29
ERBB4	29
LRP1	29
HIVEP3	28
TGFBRAP1	28
GRIN3B	27
ZAP70	27
NCOR2	26
NOTCH1	26
TNFAIP3	26
MAPK10	25
TGFB1	25
NCAPD3	24
SMARCA4	24
TACC2	24
NFASC	23
TNKS1BP1	23
USHBP1	23
ATM	22
ERCC2	22
TP53BP1	22
COL6A3	21
EIF2AK1	21
NR5A1	21
PIK3CD	19
TNR	19
UTRN	19
GRIN2A	18
HIVEP1	18
NINL	18
LRP2	17
DSP	16
NCOR1	16
SCN3A	16
SPERT	16
IGSF9	14
KDR	14
ZNF384	12
BMPR2	11
MLH1	11
ASPM	10
B2M	10
PTPN11	9
RB1	8
STAT5A	7
KIT	6
LZTR1	5
HAP1	4
CASP8	3
PRKCB	3
SOS1	2
STAT3	2
GPR50	1
PIK3R1	1
SMAD4	1
AR	0

## Sheet: CMS2
The driver mutation sequence of CMS2.
TP53	34
APC	28
PIK3CA	22
CACNA1E	16
CDH4	14
ATP5B	12
GUCY1A2	12
MUC16	12
CSDE1	11
DSCAM	10
KIDINS220	10
PAPPA	10
FAT4	9
GLI3	9
GRM7	9
PIK3CG	9
GRIN3A	8
PCDH17	8
TCF7L2	8
TTN	8
ANK2	7
DLGAP2	7
EPHA3	7
NFATC1	7
PDGFRA	7
SOX9	7
CACNA1H	6
CALCR	6
GRIK4	6
KRAS	6
LRP1B	6
RYR1	6
SYNE1	6
CDH10	5
COL4A1	5
NCOR2	5
RALY	5
ADCY8	4
KRT1	4
MAP1B	4
OBSCN	4
VCAN	4
COL6A3	3
CUBN	3
DMD	3
MYO18B	3
PCSK9	3
TNR	3
FBN1	2
KIT	2
LRP2	2
TUBGCP3	2
ZNF219	2
FLNC	1
SCN3A	1
ZNF804A	1
NFASC	0
CDH18	0
AR	0
RAC1	0
LPA	0

## Sheet: CMS3
The driver mutation sequence of CMS3.
LMO7	121
JPH3	115
ARHGAP21	114
FAT4	113
ATP5B	111
MYO3A	110
KIF1A	109
SI	108
MUC4	107
ACACB	106
PTPRT	106
CELSR1	105
GRIK2	104
NES	103
CARD10	102
ADCY1	101
PCDH17	99
USP6	98
ZNF521	98
ARID1A	97
AXIN2	96
PKHD1	94
BCL9	93
SYNE1	93
CROCC	92
MUC16	90
MUC2	90
MCM3AP	89
CACNA1H	88
PCLO	88
DYNC1H1	87
RAI1	86
TGIF1	85
DOK7	84
DOCK2	82
RCC1	81
SPHK1	80
KRAS	78
TCF7L2	78
USH2A	77
PIK3CA	75
CTNNB1	74
TTN	74
KCNJ12	72
OBSCN	70
RYR2	70
MTOR	69
ATM	68
LRP1B	67
EGFR	66
FLNC	65
SLIT2	64
UTRN	63
NLRP1	62
CLIC6	61
EP400	60
SPTB	59
CUBN	58
NEB	58
LRP2	57
SCN5A	55
PTEN	54
PDGFRA	53
PRKCB	52
KLF1	51
HIVEP3	50
MEF2A	49
PRR14	48
TYRO3	48
SRCAP	46
CD7	45
COL5A3	44
RYR1	43
POLRMT	42
HCLS1	41
IGF2R	40
ARAP1	39
TNNT2	38
NCOR2	37
DUSP16	36
DMD	35
IGSF9	34
TNC	34
LRP1	33
SPTBN2	32
TNR	30
EIF2AK1	29
ZAP70	28
SMARCA4	27
RXRG	26
JAG2	25
PKD2	24
BRCA2	23
HTT	23
TACC2	22
GRIK3	21
MKI67	21
PRRT2	19
GRIN2A	18
DNTT	17
NCOR1	17
DST	16
RASSF2	16
KIDINS220	15
ADAMTS13	14
ANK3	14
EPHA1	14
ANK2	13
RUNX1T1	13
TRPC4	12
HECW1	11
MAP1B	11
CRB2	10
GLI3	10
PTPRZ1	10
APC	9
GABRB3	9
ROBO2	9
EPHA7	8
MEFV	8
APOB	7
NF2	7
FGFR2	6
GRM2	5
CACNA1S	4
TP53	4
GRP	3
SCN2A	3
NEDD4	2
USHBP1	2
GSK3B	1
RICTOR	1
CREBBP	0
SPTA1	0

## Sheet: CMS4
The driver mutation sequence of CMS4.
TP53	23
APC	18
USH2A	18
FAT4	16
TTN	16
FBN1	13
TAF1L	13
TCF7L2	13
SOX9	12
TRPS1	12
ZNF804A	12
APOB	11
GRIK2	11
PCNT	11
PKHD1	11
RUNX1T1	11
CTNNB1	10
EPHA7	10
GLI3	10
MAGI2	10
EPHA3	9
IPO7	9
KRAS	9
RYR2	9
SYNE1	9
GRID2	8
RYR1	8
TAOK2	8
CARD11	7
CLSTN3	7
COL4A1	7
DOCK2	7
FLNC	6
MUC16	6
RP1	6
SPTA1	6
DICER1	5
MEFV	5
NES	5
ROBO2	5
TGIF1	5
THBS2	5
CDH1	4
COL18A1	4
GABRB3	4
SCN3A	4
BRCA2	3
DSP	3
LRP1B	3
OSMR	3
GRIA2	2
MSH2	2
SAAL1	2
SNX1	2
CDH4	1
DSCAM	1
NEB	1
PI4KB	1
PLG	1
PTEN	1
SMAD4	1
TGFBR2	1
PCLO	0
MED15	0
CACNA1H	0
ACACB	0
IFT80	0
NFASC	0
CASP8	0
DGKD	0
